# Supplementary material for: Prevalence of MRI findings in the cervical spine in patients with persistent neck pain based on quantification of narrative MRI reports
Source: Springer Nature journal article supplement (doi:10.1186/s12998-019-0233-3), 2019-03-06
Supplement: MOESM1 [file 16529940]

## Additional file 1 - The final set of decision rules used to extract pathoanatomic findings from MRI narrative reports

| Pathology                    | Expressions used in the narrative reports                                                                                                                                                                                                                                                                                                                      |
|------------------------------|----------------------------------------------------------------------------------------------------------------------------------------------------------------------------------------------------------------------------------------------------------------------------------------------------------------------------------------------------------------|
| <b>Modic changes type 1</b>  | <ul style="list-style-type: none"> <li>- Modic changes type 1</li> <li>- Vertebral endplate signal change type 1</li> <li>- Endplate changes type 1</li> <li>- Increased signal intensity in the endplate</li> </ul>                                                                                                                                           |
| <b>Modic changes type 2</b>  | <ul style="list-style-type: none"> <li>- Modic changes type 2</li> <li>- Vertebral endplate signal change type 2</li> <li>- Endplate changes type 2</li> <li>- Fatty degeneration in the endplate</li> </ul>                                                                                                                                                   |
| <b>Disc degeneration</b>     | <ul style="list-style-type: none"> <li>- Light/moderate/severe degeneration</li> <li>- Slight/moderate reduced disc height</li> <li>- Collapsed disc space</li> <li>- Reduced disc signal intensity</li> <li>- Spondylosis</li> <li>- Collapsed intervertebral space</li> <li>- Age related degeneration</li> </ul>                                            |
| <b>Disc herniation</b>       | <ul style="list-style-type: none"> <li>- Herniation</li> <li>- Extrusion</li> <li>- Sequestration</li> <li>- Prolapse</li> </ul>                                                                                                                                                                                                                               |
| <b>Disc bulge</b>            | <ul style="list-style-type: none"> <li>- General/broad-based/focal bulge</li> <li>- Protrusion</li> <li>- Prolapse-like protrusion</li> </ul>                                                                                                                                                                                                                  |
| <b>Nerve root compromise</b> | <ul style="list-style-type: none"> <li>- Dislocation of nerve root</li> <li>- Entrapment</li> <li>- Impression</li> <li>- Reduced space</li> <li>- Compression</li> <li>- Compromise</li> <li>- Affected nerve root</li> <li>➤ (NO nerve root compromise is registered if the following expressions are used: 'touching', 'contact', 'enhancement')</li> </ul> |
| <b>Foraminal stenosis</b>    | <ul style="list-style-type: none"> <li>- Mild/moderate/severe/pronounced/absolute foraminal stenosis</li> <li>- Reduced perineural fat signal</li> <li>- No visible perineural fat</li> <li>- Reduced foraminal area</li> <li>- Formation of osteophytes in foramen</li> </ul>                                                                                 |
| <b>Central stenosis</b>      | <ul style="list-style-type: none"> <li>- Mild/moderate/severe/pronounced/absolute central stenosis</li> <li>- Reduced fluid around nerve roots or medulla</li> <li>- No visible fluid around nerve roots or medulla</li> </ul>                                                                                                                                 |

|                                |                                                                                                                                                                                                                                                                                                                                                  |
|--------------------------------|--------------------------------------------------------------------------------------------------------------------------------------------------------------------------------------------------------------------------------------------------------------------------------------------------------------------------------------------------|
|                                | <ul style="list-style-type: none"> <li>– Reduced space in central canal</li> <li>– Canal stenosis</li> <li>– Spinal stenosis</li> <li>– Myelopathy</li> </ul>                                                                                                                                                                                    |
| <b>Facet joint arthrosis</b>   | <ul style="list-style-type: none"> <li>– Mild/moderate/severe arthrosis</li> <li>– Osteophytes in relation to facet joint</li> <li>– Narrowing of joint space</li> <li>– Cysts in relation to facet joint</li> <li>– Degenerative changes</li> <li>– Age related facet joint changes</li> <li>– Ankylosis</li> <li>– Spondylarthrosis</li> </ul> |
| <b>Uncovertebral arthrosis</b> | <ul style="list-style-type: none"> <li>– Mild/moderate/severe arthrosis</li> <li>– Osteophytes in relation to uncovertebral joint</li> </ul>                                                                                                                                                                                                     |
| <b>Exclusion criteria</b>      | <ul style="list-style-type: none"> <li>– Subluxation</li> <li>– Cancer</li> <li>– Infection</li> <li>– Inflammatory arthritis</li> <li>– Fracture</li> <li>– Previously surgery in cervical spine</li> <li>– Other serious pathology</li> </ul>                                                                                                  |

\*The original document is in Danish and has been translated for this publication
